# Supplementary material for: Real-world wintertime CO, N 2 O, and CO 2 emissions of a central European village
Source: Copernicus journal article supplement (doi:10.5194/amt-15-5019-2022), 2022-09-01
Supplement: Supplementary file 1 [file amt-15-5019-2022-supplement.pdf]

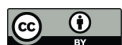

*Supplement of*

## **Real-world wintertime CO, N<sub>2</sub>O, and CO<sub>2</sub> emissions of a central European village**

**László Haszpra et al.**

*Correspondence to:* László Haszpra ([haszpra.l@gmail.com](mailto:haszpra.l@gmail.com))

The copyright of individual parts of the supplement might differ from the article licence.

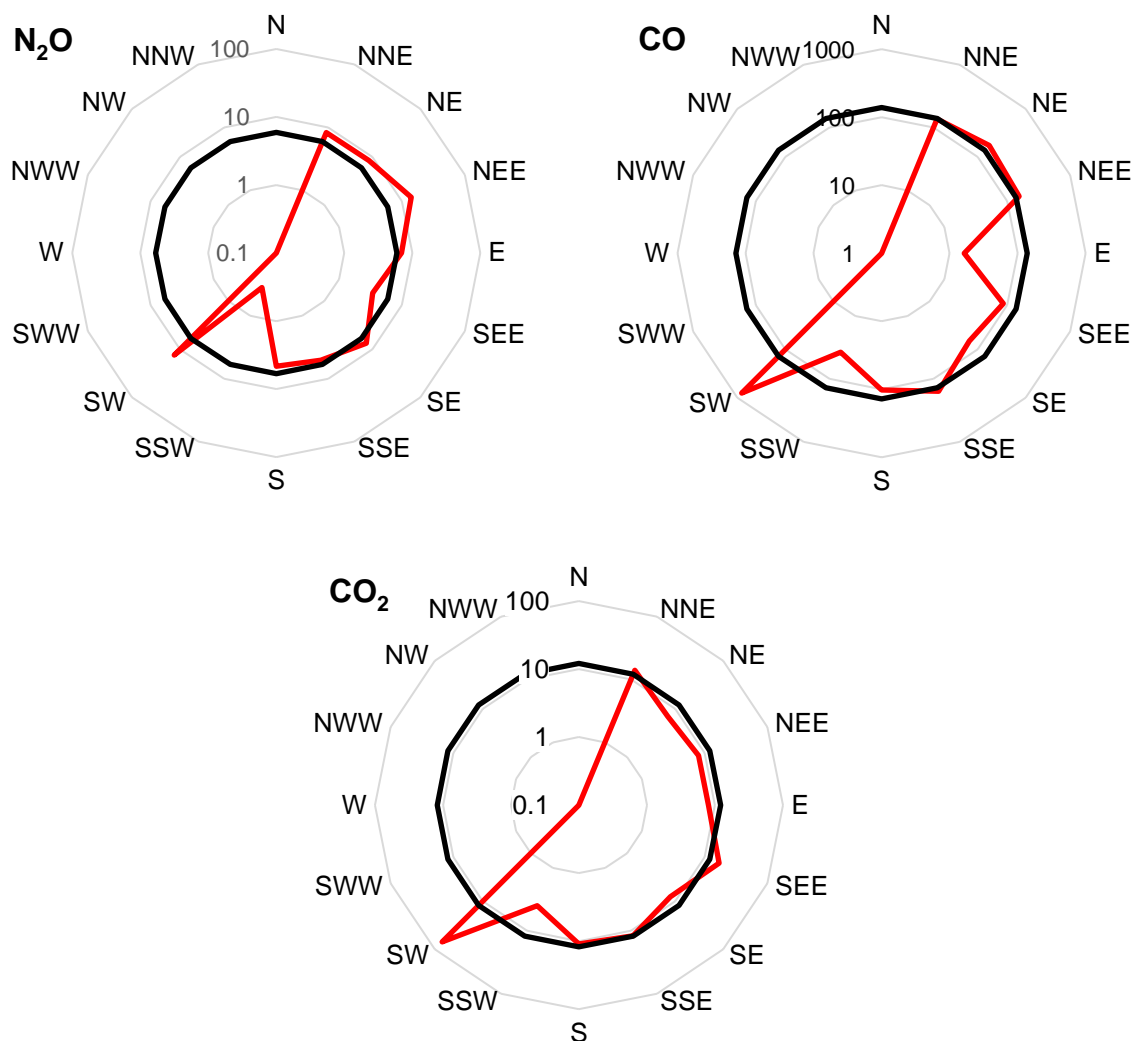

| N | NNE | NE | NEE | E  | SEE | SE  | SSE | S  | SSW | SW | SWW | W | NWW | NW | NNW |
|---|-----|----|-----|----|-----|-----|-----|----|-----|----|-----|---|-----|----|-----|
| 0 | 54  | 91 | 48  | 30 | 36  | 142 | 530 | 70 | 60  | 49 | 6   | 2 | 0   | 0  | 2   |

**Figure S1:** Sectorial distribution of the median fluxes of  $\text{N}_2\text{O}$  ( $\text{ng m}^{-2} \text{s}^{-1}$ ),  $\text{CO}$  ( $\text{ng m}^{-2} \text{s}^{-1}$ ), and  $\text{CO}_2$  ( $\mu\text{g m}^{-2} \text{s}^{-1}$ ) of the „natural” landscape (red), the median flux calculated using all available data (black), and the available data per sector. No median is calculated for  $n < 10$ . Logarithmic scale is applied for the better visualization. The village is located in the SW-W-NW-N sector (see Fig. 3 in the main text of the paper).

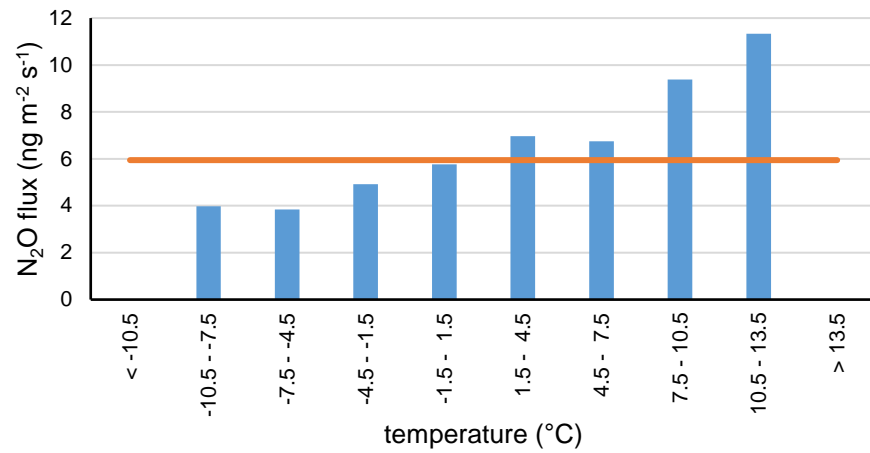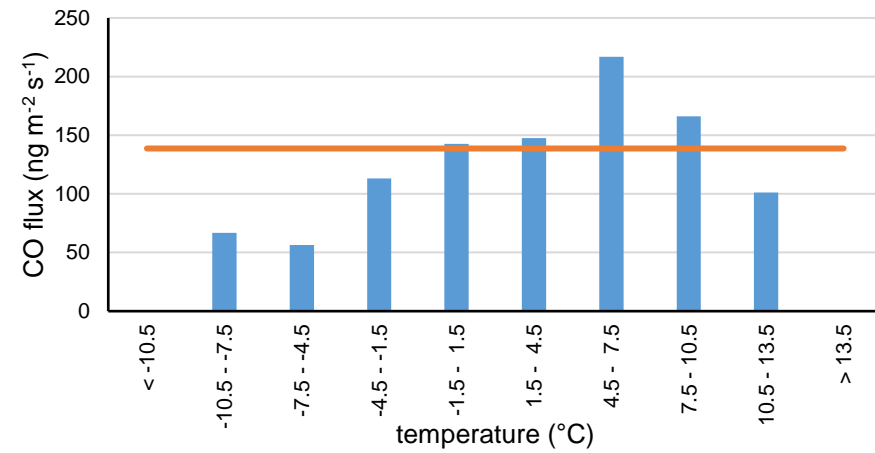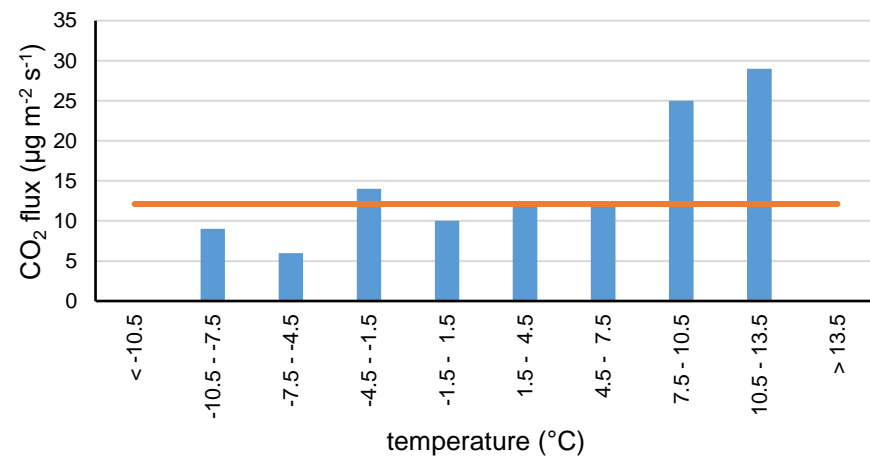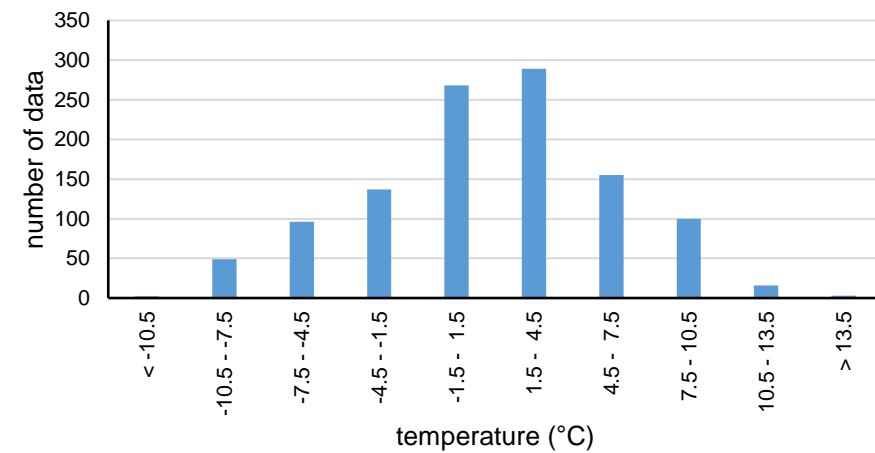

**Figure S2:** Temperature dependences of the median emission density of the „natural” landscape, the medians of all available data (orange lines), and the number of data in each temperature range. No median is calculated for n<10.

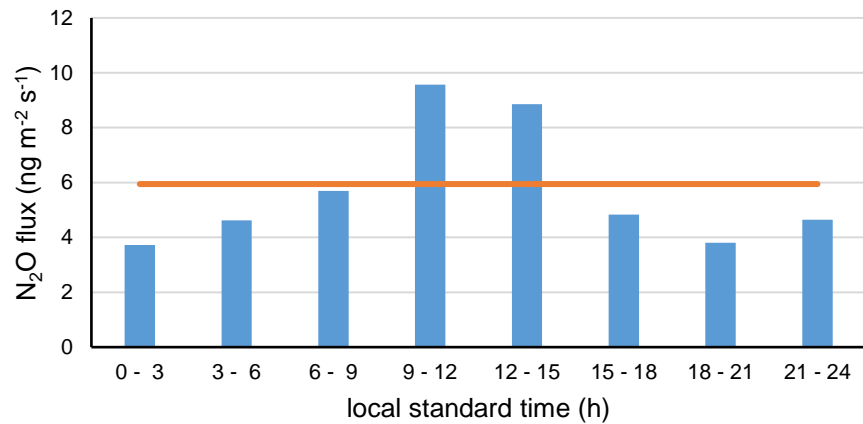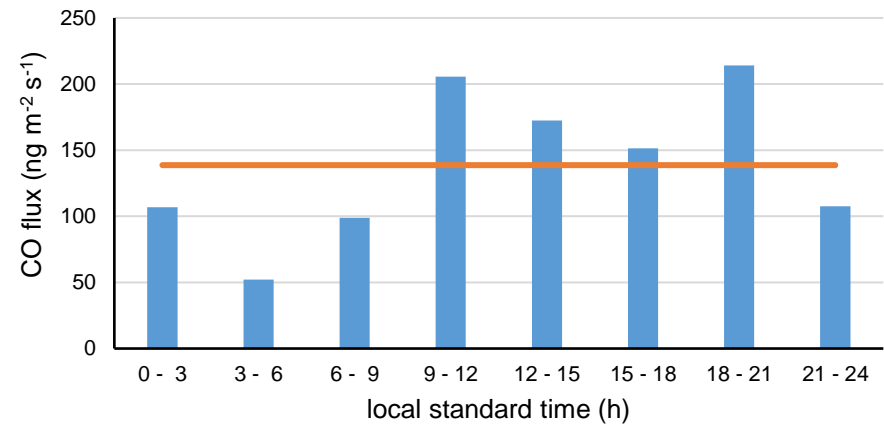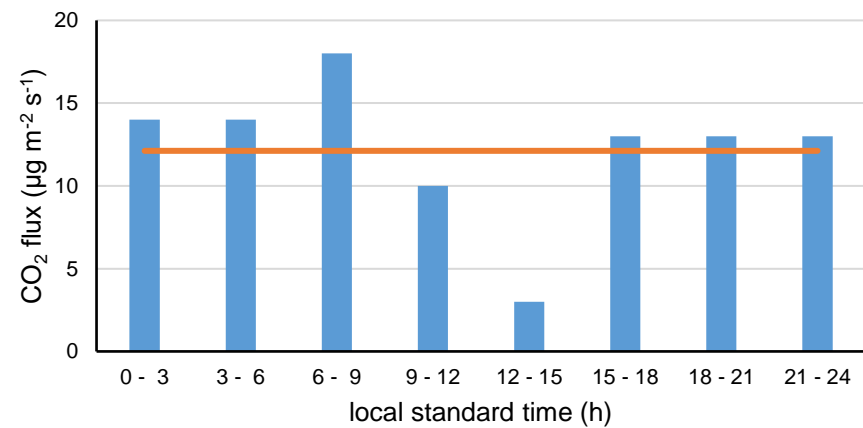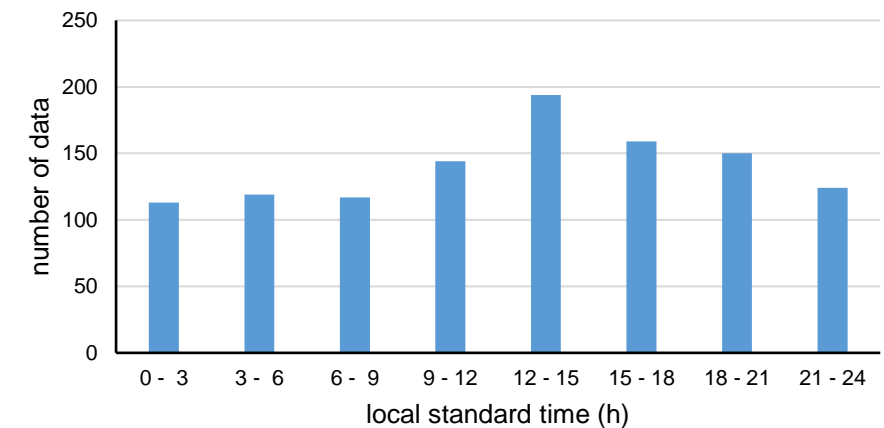

**Figure S3:** Diurnal variations of the median emission density of the „natural” landscape, the medians of all available data (orange lines), and the number of data in each time range.

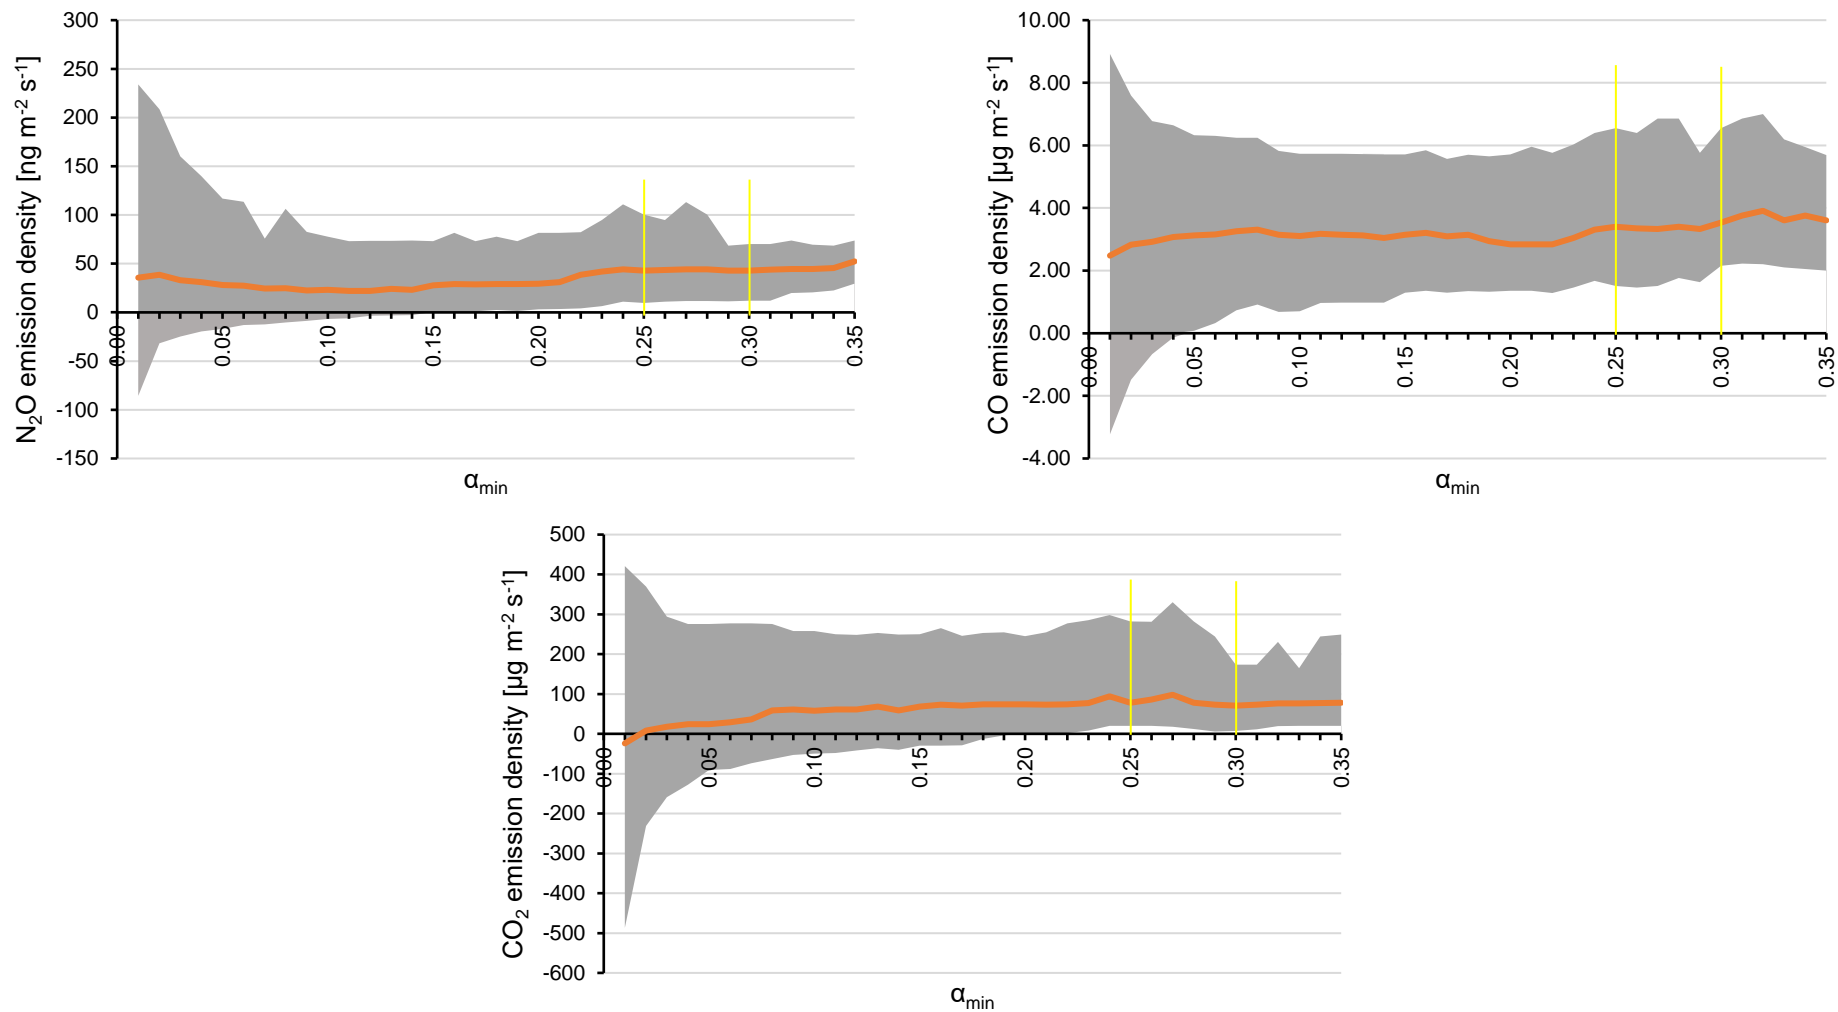

**Figure S4:** Convergences of the median emission densities (orange lines) and interquartile ranges (grey bands) as the function of the minimum footprint coverage of the village ( $\alpha_{\min}$ ). The vertical yellow lines indicate the values presented in Table 1 in the main text of the paper ( $\alpha \geq 0.25$  and  $\alpha \geq 0.30$ ). The number of data available for the calculations is shown in Fig. 5 in the main text.

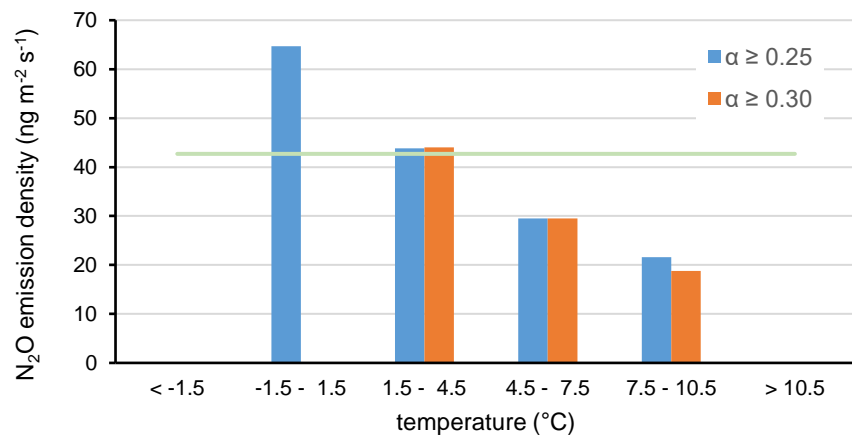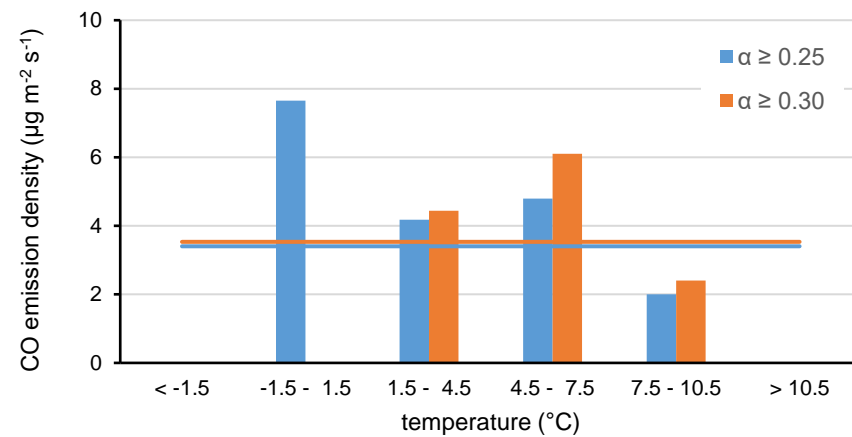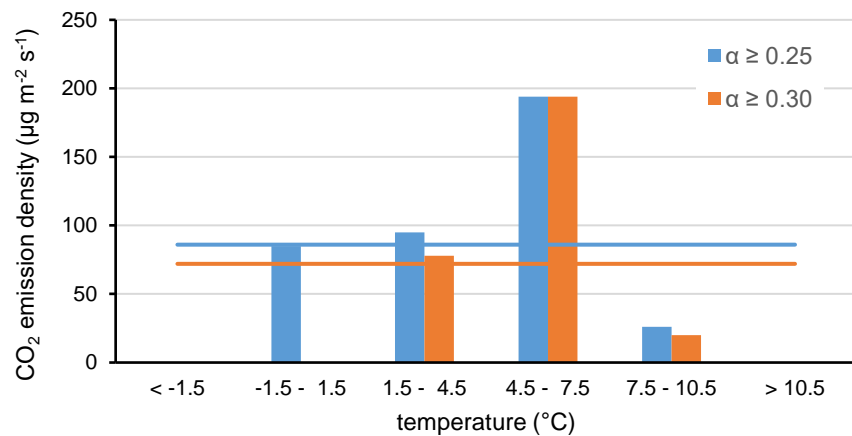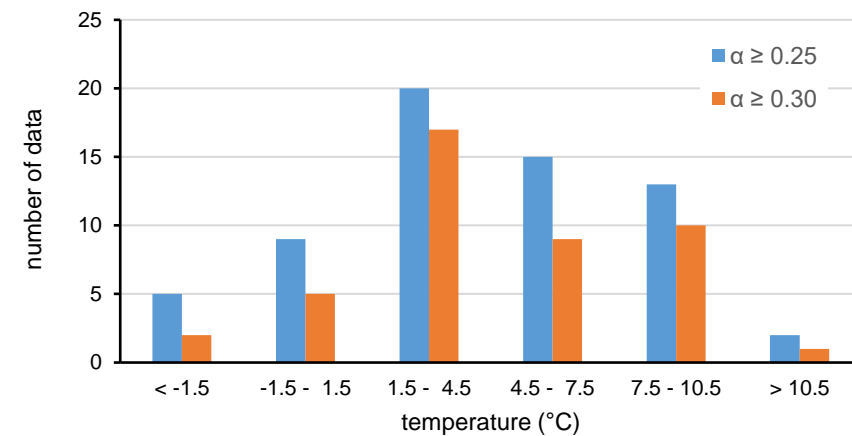

**Figure S5:** Temperature dependences of the median emission densities in the village for  $\alpha \geq 0.25$  and  $\alpha \geq 0.30$ , the medians of all available data (blue and orange lines), and the number of data in each temperature range. No median is calculated for  $n < 9$ . Note: in the case of N<sub>2</sub>O the medians of all available data for  $\alpha \geq 0.25$  and  $\alpha \geq 0.30$  are equal (green line).

**Table S1:** Median of  $F_{\text{natural}}$  as the function of temperature and time-of-day. No median is calculated if the number of data points is less than 10

**CO** ( $\mu\text{g m}^{-2} \text{s}^{-1}$ )

| local standard time (h)                  | 0-3  | 3-6  | 6-9  | 9-12 | 12-15 | 15-18 | 18-21 | 21-24 |
|------------------------------------------|------|------|------|------|-------|-------|-------|-------|
| temperature range ( $^{\circ}\text{C}$ ) |      |      |      |      |       |       |       |       |
| -10.5 - -7.5                             | —    | —    | —    | —    | —     | —     | —     | —     |
| -7.5 - -4.5                              | 0.04 | 0.05 | 0.06 | —    | 0.18  | —     | 0.02  | 0.09  |
| -4.5 - -1.5                              | 0.11 | 0.01 | 0.01 | 0.11 | 0.37  | 0.16  | 0.15  | 0.06  |
| -1.5 - 1.5                               | 0.02 | 0.04 | 0.16 | 0.20 | 0.14  | 0.21  | 0.22  | 0.19  |
| 1.5 - 4.5                                | 0.14 | 0.04 | 0.11 | 0.27 | 0.10  | 0.21  | 0.21  | 0.09  |
| 4.5 - 7.5                                | 0.18 | 0.09 | 0.26 | 0.12 | 0.30  | 0.31  | 0.27  | 0.05  |
| 7.5 - 10.5                               | —    | —    | —    | 0.30 | 0.20  | 0.08  | 0.30  | —     |
| 10.5 - 13.5                              | —    | —    | —    | —    | —     | —     | —     | —     |

**N<sub>2</sub>O** ( $\text{ng m}^{-2} \text{s}^{-1}$ )

| local standard time (h)                  | 0-3   | 3-6  | 6-9   | 9-12  | 12-15 | 15-18 | 18-21 | 21-24 |
|------------------------------------------|-------|------|-------|-------|-------|-------|-------|-------|
| temperature range ( $^{\circ}\text{C}$ ) |       |      |       |       |       |       |       |       |
| -10.5 - -7.5                             | —     | —    | —     | —     | —     | —     | —     | —     |
| -7.5 - -4.5                              | 1.51  | 3.57 | 1.95  | —     | 4.59  | —     | 6.18  | 2.3   |
| -4.5 - -1.5                              | 12.09 | 1.45 | 3.61  | 4.65  | 6.53  | 6.55  | 1.61  | 1.78  |
| -1.5 - 1.5                               | 2.9   | 4.89 | 5.69  | 11.46 | 4.66  | 5.04  | 3.09  | 4.64  |
| 1.5 - 4.5                                | 5.72  | 4.34 | 9.69  | 9.57  | 9.46  | 8.3   | 4.46  | 5.69  |
| 4.5 - 7.5                                | 3.2   | 3.64 | 12.07 | 11.14 | 12.4  | 3.87  | 4.25  | 2.78  |
| 7.5 - 10.5                               | —     | —    | —     | 14.42 | 10.37 | 2.82  | 4.86  | —     |
| 10.5 - 13.5                              | —     | —    | —     | —     | —     | —     | —     | —     |

**CO<sub>2</sub>** ( $\mu\text{g m}^{-2} \text{s}^{-1}$ )

| local standard time (h)                  | 0-3  | 3-6  | 6-9  | 9-12  | 12-15 | 15-18 | 18-21 | 21-24 |
|------------------------------------------|------|------|------|-------|-------|-------|-------|-------|
| temperature range ( $^{\circ}\text{C}$ ) |      |      |      |       |       |       |       |       |
| -10.5 - -7.5                             | —    | —    | —    | —     | —     | —     | —     | —     |
| -7.5 - -4.5                              | 5.3  | 7.8  | 3.1  | —     | 23.6  | —     | 6.8   | 3.4   |
| -4.5 - -1.5                              | 1.7  | 7.4  | 9.2  | 13.6  | 20.0  | 18.9  | 15.4  | 18.0  |
| -1.5 - 1.5                               | 1.3  | 10.1 | 29.9 | 8.5   | 2.4   | 8.1   | 7.2   | 13.5  |
| 1.5 - 4.5                                | 22.0 | 26.6 | 25.0 | 8.8   | -4.2  | 15.7  | 12.6  | 12.7  |
| 4.5 - 7.5                                | 29.9 | 55.5 | 80.6 | 2.6   | -5.3  | 6.6   | 12.6  | 13.0  |
| 7.5 - 10.5                               | —    | —    | —    | -12.0 | 2.1   | 16.7  | 62.2  | —     |
| 10.5 - 13.5                              | —    | —    | —    | —     | —     | —     | —     | —     |

**Number of data points**

| local standard time (h)                  | 0-3 | 3-6 | 6-9 | 9-12 | 12-15 | 15-18 | 18-21 | 21-24 |
|------------------------------------------|-----|-----|-----|------|-------|-------|-------|-------|
| temperature range ( $^{\circ}\text{C}$ ) |     |     |     |      |       |       |       |       |
| -10.5 - -7.5                             | 3   | 7   | 8   | 8    | 8     | 5     | 5     | 3     |
| -7.5 - -4.5                              | 18  | 13  | 13  | 7    | 15    | 5     | 11    | 12    |
| -4.5 - -1.5                              | 11  | 11  | 17  | 19   | 11    | 18    | 25    | 20    |
| -1.5 - 1.5                               | 25  | 32  | 39  | 41   | 41    | 37    | 26    | 22    |
| 1.5 - 4.5                                | 34  | 30  | 24  | 40   | 46    | 37    | 41    | 44    |
| 4.5 - 7.5                                | 15  | 19  | 12  | 15   | 30    | 25    | 28    | 14    |
| 7.5 - 10.5                               | 7   | 6   | 1   | 10   | 33    | 26    | 13    | 8     |
| 10.5 - 13.5                              | 0   | 1   | 2   | 3    | 5     | 4     | 0     | 1     |
